# Supplementary material
Source: Frontiers journal article supplement (https://www.frontiersin.org/articles/420206)
Supplement: Table_1.pdf [file Table_1.pdf]

## PATIENT DATA

---

**Age:**  year

**Weight:**  kg

**Sex :** Male ☐  
Female ☐

**Living situation:** Single ☐  
Living together ☐  
Other .....

**Dutch speaking:** Yes ☐  
No ☐

**Receives sachet packed medication:**  
Yes ☐  
No ☐

**Patient is illiterate or low literate :**  
Yes ☐  
No ☐

**What is the highest level of education?**

No education / elementary education ☐

Pre-vocational education ☐

Vocational training ☐

Selective secondary education ☐

University of applied science/university ☐

**How many fall incidents did the patient have in the last 12 months?**

- |           |                          |
|-----------|--------------------------|
| Not       | <input type="checkbox"/> |
| 1 time    | <input type="checkbox"/> |
| 2-3 times | <input type="checkbox"/> |
| ≥4 times  | <input type="checkbox"/> |

**How many unplanned hospitalizations did the patient have in the last 12 months?**

- |           |                          |
|-----------|--------------------------|
| Not       | <input type="checkbox"/> |
| 1 time    | <input type="checkbox"/> |
| 2-3 times | <input type="checkbox"/> |
| ≥4 times  | <input type="checkbox"/> |

**How many prescribers does the patient have?**

- |                                               |                          |
|-----------------------------------------------|--------------------------|
| <b>1</b> (only the general practitioner (GP)) | <input type="checkbox"/> |
| <b>2</b> (GP + 1 specialist)                  | <input type="checkbox"/> |
| <b>3</b> (GP + 2 specialists)                 | <input type="checkbox"/> |
| <b>4 or more</b> (GP + 3 or more specialists) | <input type="checkbox"/> |

**Indicate to what extent the following aspects are applicable for this patient:**

**Eyesight impairment:**

|                          |                          |                          |                          |                          |                    |
|--------------------------|--------------------------|--------------------------|--------------------------|--------------------------|--------------------|
| Not impaired             |                          |                          |                          |                          | Seriously impaired |
| 1                        | 2                        | 3                        | 4                        | 5                        |                    |
| <input type="checkbox"/> | <input type="checkbox"/> | <input type="checkbox"/> | <input type="checkbox"/> | <input type="checkbox"/> |                    |

**Hearing impairment:**

|                          |                          |                          |                          |                          |                    |
|--------------------------|--------------------------|--------------------------|--------------------------|--------------------------|--------------------|
| Not impaired             |                          |                          |                          |                          | Seriously impaired |
| 1                        | 2                        | 3                        | 4                        | 5                        |                    |
| <input type="checkbox"/> | <input type="checkbox"/> | <input type="checkbox"/> | <input type="checkbox"/> | <input type="checkbox"/> |                    |

**Diminished cognition:**

|                          |                          |                          |                          |                          |                    |
|--------------------------|--------------------------|--------------------------|--------------------------|--------------------------|--------------------|
| Not impaired             |                          |                          |                          |                          | Seriously impaired |
| 1                        | 2                        | 3                        | 4                        | 5                        |                    |
| <input type="checkbox"/> | <input type="checkbox"/> | <input type="checkbox"/> | <input type="checkbox"/> | <input type="checkbox"/> |                    |

**Diminished mobility:**

|                          |                          |                          |                          |                          |                    |
|--------------------------|--------------------------|--------------------------|--------------------------|--------------------------|--------------------|
| Not impaired             |                          |                          |                          |                          | Seriously impaired |
| 1                        | 2                        | 3                        | 4                        | 5                        |                    |
| <input type="checkbox"/> | <input type="checkbox"/> | <input type="checkbox"/> | <input type="checkbox"/> | <input type="checkbox"/> |                    |

**Social network:**

|                          |                          |                          |                          |                          |                   |
|--------------------------|--------------------------|--------------------------|--------------------------|--------------------------|-------------------|
| Adequate social network  |                          |                          |                          |                          | No social network |
| 1                        | 2                        | 3                        | 4                        | 5                        |                   |
| <input type="checkbox"/> | <input type="checkbox"/> | <input type="checkbox"/> | <input type="checkbox"/> | <input type="checkbox"/> |                   |

## SIGNALS FROM THE PATIENT

---

### Does the patient have problems with medication adherence?

No problems ☐

Frequently forgets medication ☐

Has difficulties to understand the instructions ☐

Deviates from instructions without consultation ☐

Other, namely:.....

### The patient has indicated that he/she suffers from side effects:

Yes *Complete with information about type and seriousness*

No ☐

### The patient has indicated that he/she has problems with the intake of medication (such as swallowing problems)?

Yes, namely: *Complete with type of medication taking problem*

No ☐

### The patient has indicated that he/she thinks that the medication is not working:

Yes ☐

No ☐

### The patient has indicated that he/she worries about the amount of medication that is prescribed:

Yes ☐

No ☐

### The patient collects the medication him/herself at the pharmacy:

Yes ☐

No ☐

### The patient has difficulties to communicate about his/her situation:

Yes ☐

No ☐

**The patient seeks timely contact with the healthcare professionals when it is needed:**

Yes ☐

No ☐

**Are there any other relevant background characteristics known**

.....

## MOST RECENT ASSESSMENTS

| Type of assessment      | Outcome value             |
|-------------------------|---------------------------|
| Blood pressure          | / mmHg                    |
| LDL-cholesterol         | mmol/l                    |
| HDL-cholesterol         | mmol/l                    |
| Total cholesterol       | mmol/l                    |
| Total cholesterol/HDL-c |                           |
| eGFR                    | ml/min/1,73m <sup>2</sup> |
| Sodium                  | mmol/L                    |
| Potassium               | mmol/L                    |
| TSH                     | mU/l                      |
| Hb1Ac                   | mmol/mol                  |
| ALAT                    | U/l                       |
| ASAT                    | U/L                       |
| Other assessment        |                           |
| Other assessment        |                           |
| Other assessment        |                           |
