# Supplementary material
Source: Frontiers journal article supplement (https://www.frontiersin.org/articles/420206)
Supplement: Table_2.pdf [file Table_2.pdf]

*Appendix ii. Predictors used in univariate testing for the development of the algorithm, grouped by category, and reasons of exclusion for testing in the multivariate models*

| Predictor                         | Description                                                                                                  | Univariate analysis | P-value (algorithm score) | Reason of exclusion                                           |
|-----------------------------------|--------------------------------------------------------------------------------------------------------------|---------------------|---------------------------|---------------------------------------------------------------|
| <b>Medication distribution</b>    |                                                                                                              |                     |                           |                                                               |
| Collects his/her own medication†  | Medication is collected by the patient him/herself at the pharmacy.                                          | T-test              | 0.0020                    | -                                                             |
| Sachet packed medication‡         | Receives sachet packed medication                                                                            | T-test              | 0.0045                    | -                                                             |
| <b>Mobility</b>                   |                                                                                                              |                     |                           |                                                               |
| Diminished mobility†              | Has no to seriously impaired mobility                                                                        | T-test              | <0.0001                   | -                                                             |
| Diminished mobility (categorised) | Diminished mobility in 5 categories from not to seriously impaired mobility                                  | Oneway anova        | <0.0001                   | No difference in complexity between different categories      |
| <b>Blood pressure</b>             |                                                                                                              |                     |                           |                                                               |
| Systolic blood pressure†          | Systolic blood pressure                                                                                      | Linear regression   | 0.0053                    | -                                                             |
| Low systolic blood pressure‡      | Systolic blood pressure below 120 mmHg when under 80 years old and below 140 mmHg when 80 years or older     | T-test              | 0.0107                    | -                                                             |
| Diastolic blood pressure          | Diastolic blood pressure                                                                                     | Linear regression   | 0.2881                    | P-value >0.25                                                 |
| High systolic blood pressure      | Systolic blood pressure over 140 mmHg when <80 years or Systolic blood pressure over 160 mmHg when ≥80 years | T-test              | 0.1077                    | Patients with high blood pressure had a lower algorithm score |

|                                                                                                                          |                                                                                                                                                                       |                   |         |               |
|--------------------------------------------------------------------------------------------------------------------------|-----------------------------------------------------------------------------------------------------------------------------------------------------------------------|-------------------|---------|---------------|
| High or low systolic blood pressure                                                                                      | Either low or high systolic blood pressure                                                                                                                            | T-test            | 0.3005  | P-value >0.25 |
| High or low blood pressure + at least 3 antihypertensive medications                                                     | Has high or low blood systolic pressure in combination with $\geq 3$ antihypertensive medications                                                                     | T-test            | 0.7394  | P-value >0.25 |
| Low systolic blood pressure + at least 3 antihypertensive medications                                                    | Low systolic blood pressure in combination with $\geq 3$ antihypertensive medications                                                                                 | T-test            | 0.2841  | P-value >0.25 |
| <b>Medication</b>                                                                                                        |                                                                                                                                                                       |                   |         |               |
| Number of medications <sup>†</sup>                                                                                       | A count of all medications with a distinct ATC-code                                                                                                                   | Linear regression | <0.0001 | -             |
| Number of antihypertensive medications                                                                                   | A count of antihypertensive medications                                                                                                                               | Linear regression | 0.3123  | P-value >0.25 |
| HARM medication (Leendertse et al., 2008) <sup>‡</sup>                                                                   | A count of medications responsible for many medication related hospitalisations according to the HARM study, excluding antibiotics                                    | Linear regression | 0.0816  | -             |
| HARM+ narrow therapeutic index + high risk medication (Barnett et al., 2011; Blix et al., 2010; Leendertse et al., 2008) | A count of medications responsible for many medication related hospitalisations according to the HARM study (excluding antibiotics) plus other medications considered | Linear regression | 0.0062  | -             |

|                                                              |                                                                                                                 |                   |         |               |
|--------------------------------------------------------------|-----------------------------------------------------------------------------------------------------------------|-------------------|---------|---------------|
| Saedder et al., 2014)‡                                       | to be high risk medication                                                                                      |                   |         |               |
| ACB anticholinergic score (Campbell et al., 2009)‡           | A score of the anticholinergic load of the medications according to the Anticholinergic Cognitive Burden Scale  | Linear regression | 0.0228  | -             |
| Number of medications requiring adjustment according to eGFR | A count of the medications that need to be adjusted in the presence of low eGFR                                 | Linear regression | 0.9853  | P-value >0.25 |
| MRCI (George et al., 2004)‡                                  | Adjusted Medication regimen complexity index (MRCI)                                                             | Linear regression | <0.0001 | -             |
| Number of units a day‡                                       | A count of all units (pills, inhalations, injections, etc.) to be used per day                                  | Linear regression | <0.0001 | -             |
| <b>Kidney function</b>                                       |                                                                                                                 |                   |         |               |
| eGFR†                                                        | Estimated Glomerular Filtration Rate                                                                            | Linear regression | 0.2368  | -             |
| eGFR categorised                                             | eGFR in 3 categories: <30 , 30-59 and >59 ml/min/1,73m <sup>2</sup>                                             | Oneway anova      | 0.2729  | P-value >0.25 |
| Low eGFR in combination with a relevant medication‡          | eGFR <60 ml/min/1,73m <sup>2</sup> in combination with at least 1 medication that needs to be adjusted for eGFR | T-test            | 0.2448  | -             |
| <b>Hospitalisations</b>                                      |                                                                                                                 |                   |         |               |
| Hospitalisation in                                           | Has had at least 1                                                                                              | T-test            | 0.0047  | -             |

|                                                                         |                                                                           |                   |         |                                                                |
|-------------------------------------------------------------------------|---------------------------------------------------------------------------|-------------------|---------|----------------------------------------------------------------|
| the last 12 months <sup>†</sup>                                         | unplanned hospitalisation is the last 12 months                           |                   |         |                                                                |
| Number of unplanned hospitalisations in last 12 months                  | Unplanned hospitalisations in 4 categories: none; 1; 2 or 3 ; 4 or more   | Oneway anova      | 0.0253  | No difference in complexity between 1 or more hospitalisations |
| <b>Morbidity scores</b>                                                 |                                                                           |                   |         |                                                                |
| QOF (Carey et al., 2013) <sup>‡</sup>                                   | Quality and Outcomes Framework score                                      | Linear regression | <0.0001 | -                                                              |
| QOF extended, excluding renal disease (Carey et al., 2013) <sup>‡</sup> | Quality and Outcomes Framework extended score                             | Linear regression | <0.0001 | -                                                              |
| QOF extended excluding renal disease (Carey et al., 2013) <sup>†</sup>  | Quality and Outcomes Framework extended score, excluding renal disease    | Linear regression | <0.0001 | -                                                              |
| <b>Cholesterol</b>                                                      |                                                                           |                   |         |                                                                |
| Total cholesterol                                                       | Total cholesterol level                                                   | Linear regression | 0.0511  | Patients with a high cholesterol had a lower algorithm score   |
| Total cholesterol/HDL                                                   | Total cholesterol divided by High-density-lipoprotein (HDL) level         | Linear regression | 0.9805  | P-value >0.25                                                  |
| <b>Fall incidents</b>                                                   |                                                                           |                   |         |                                                                |
| Fall incidents <sup>†</sup>                                             | Has had at least 1 severe fall incident is the last 12 months             | T-test            | 0.0006  | -                                                              |
| Fall incidents categorised                                              | Number of fall incidents in 4 categories: no falls; 1; 2 or 3 ; 4 or more | Oneway anova      | 0.0018  | No difference between 1 or more fall incidents                 |
| <b>Age</b>                                                              |                                                                           |                   |         |                                                                |

|                                                                  |                                                                               |                   |         |                                                                                           |
|------------------------------------------------------------------|-------------------------------------------------------------------------------|-------------------|---------|-------------------------------------------------------------------------------------------|
| Age†                                                             | Age                                                                           | Linear regression | 0.0483  | -                                                                                         |
| Age categorised                                                  | Age in 5 year classes                                                         | Oneway anova      | 0.0409  | Differences between groups cannot be explained by older age                               |
| <b>Other individual characteristics (not part of a category)</b> |                                                                               |                   |         |                                                                                           |
| Number of prescribers†                                           | A count of all active prescribers including the GP                            | Linear regression | <0.0001 | -                                                                                         |
| Diminished eyesight                                              | Diminished eyesight in 5 categories from not to seriously diminished eyesight | Oneway anova      | 0.1190  | Differences between groups cannot be explained by the severity of the eyesight impairment |
| Diminished social network                                        | Diminished social network in 5 categories from no to adequate social network  | Oneway anova      | 0.0353  | Differences between groups cannot be explained by more severely diminished social network |
| Adherence issue†                                                 | Patient has some form of adherence problems                                   | T-test            | 0.1488  | -                                                                                         |
| Believes that (some of the) medication does not work†            | Patient believes that (some of) his/her medication does not work              | T-test            | 0.1683  | -                                                                                         |
| Worries about the amount of medication†                          | Patient worries about the amount of medication he/she is taking               | T-test            | 0.1974  | -                                                                                         |
| Difficulty in communicating†                                     | Patient has difficulties in communicating (with healthcare professionals)     | T-test            | 0.0818  | -                                                                                         |
| Education                                                        | Level of education                                                            | Oneway            | 0.3089  | P-value >0.25                                                                             |

|                                           |                                                                                                               |              |        |               |
|-------------------------------------------|---------------------------------------------------------------------------------------------------------------|--------------|--------|---------------|
|                                           | divided in 5 categories                                                                                       | anova        |        |               |
| Deviating potassium or sodium levels      | Potassium or sodium level is outside the reference value; potassium [3.5-5.0 mmol/L]; sodium [135-145 mmol/L] | T-test       | 0.8062 | P-value >0.25 |
| Side effect(s)                            | Reported at least 1 side effect                                                                               | T-test       | 0.4841 | P-value >0.25 |
| Intake problem(s)                         | At least 1 issue for medication intake, e.g. swallowing problem, inhalation problem                           | T-test       | 0.6834 | P-value >0.25 |
| Diminished hearing                        | Diminished hearing in 5 categories from not to seriously impaired hearing                                     | Oneway anova | 0.9416 | P-value >0.25 |
| Diminished cognition                      | Diminished cognition in 5 categories from not to seriously impaired cognition                                 | Oneway anova | 0.6479 | P-value >0.25 |
| Sex                                       | Male or female                                                                                                | T-test       | 0.6706 | P-value >0.25 |
| Contacts healthcare professionals in time | Patient contacts healthcare professionals in time when needed                                                 | T-test       | 0.3407 | P-value >0.25 |

† Included in the first backward stepwise linear regression procedure,‡ Alternative predictor tested in the model

## References

Barnett, K., McCowan, C., Evans, J. M. M., Gillespie, N. D., Davey, P. G., and Fahey, T. (2011). Prevalence and outcomes of use of potentially inappropriate medicines in older people: cohort study stratified by residence in nursing home or in the community. *BMJ Qual. Saf.* 20, 275–281. doi: 10.1136/bmjqs.2009.039818

- Blix, H. S., Viktil, K. K., Moger, T. A., and Reikvam, A. (2010). Drugs with narrow Q11 therapeutic index as indicators in the risk management of hospitalised patients. *Pharm. Pract.* 8, 50–55. doi: 10.4321/S1886-36552010000100006
- Campbell, N., Boustani, M., Limbil, T., Ott, C., Fox, C., Maidment, I., et al. (2009). The cognitive impact of anticholinergics: a clinical review. *Clin. Interv. Aging* 4:225–233. doi: 10.2147/CIA.S5358
- Carey, I. M., Shah, S. M., Harris, T., DeWilde, S., and Cook, D. G. (2013). A new simple primary care morbidity score predicted mortality and better explains between practice variations than the Charlson index. *J. Clin. Epidemiol.* 66, 436–444. doi: 10.1016/j.jclinepi.2012.10.012
- George, J., Phun, Y., Bailey, M. J., Kong, D. C. M., and Stewart, K. (2004). Development and validation of the medication regimen complexity Index. *Ann. Pharmacother.* 38, 1369–1376. doi: 10.1345/aph.1D479
- Leendertse, A. J., Egberts, A. C., Stoker, L. J., and van den Bemt, P. M. (2008). HARM study group frequency of and risk factors for preventable medication related hospital admissions in the Netherlands. *Arch. Intern. Med.* 168,1890–1896. doi: 10.1001/archinternmed.2008.3
- Saedder, E. A., Brock, B., Nielsen, L. P., Bonnerup, D. K., and Lisby, M. (2014). Identifying high-risk medication: a systematic literature review. *Eur. J. Clin. Pharmacol.* 70, 637–645. doi: 10.1007/s00228-014-1668-z
